# Supplementary material
Source: PubMed Central journal article supplement (PMC2864386)
Supplement: 2009.015495_1.pdf [file 2009.015495_1.pdf]

# In vitro and in vivo rationale for the triple combination of panobinostat (LBH589) and dexamethasone with either bortezomib (PBD) or lenalidomide (PLD) in multiple myeloma

Enrique M. Ocio,<sup>1,2</sup> David Vilanova,<sup>1</sup> Peter Atadja,<sup>3</sup> Patricia Maiso,<sup>1</sup> Edvan Crusoe,<sup>1,4</sup> Diego Fernández-Lázaro,<sup>1</sup> Mercedes Garayoa,<sup>1</sup> Laura San-Segundo,<sup>1</sup> Teresa Hernández-Iglesias,<sup>1</sup> Enrique de Álava,<sup>1</sup> Wenlin Shao,<sup>3</sup> Yun-gmae Yao,<sup>3</sup> Atanasio Pandiella,<sup>1</sup> and Jesús F. San-Miguel<sup>1,2</sup>

<sup>1</sup>Centro de Investigación del Cáncer, IBMCC/CSIC-Universidad de Salamanca, Spain; <sup>2</sup>Department of Hematology, University Hospital of Salamanca, Salamanca, Spain, and <sup>3</sup>Novartis Institutes for Biomedical Research, Cambridge, MA, USA

Citation: Ocio EM, Vilanova D, Atadja P, Maiso P, Crusoe E, Fernández-Lázaro D, Garayoa M, San-Segundo L, Hernández-Iglesias T, de Álava E, Shao W, Yao Y-g, Pandiella A, and San-Miguel JF. In vitro and in vivo rationale for the triple combination of panobinostat (LBH589) and dexamethasone with either bortezomib (PBD) or lenalidomide (PLD) in multiple myeloma. *Haematologica* 2009;XXX doi:10.3324/haematol.2009.015495

©2009 Ferrata Storti Foundation. This is an open-access paper.

**Supplementary Table 1.** Genes specifically deregulated by the triple combinations of PBD. MM1S cells were treated with panobinostat (7 nM), dexamethasone (0.9 μM) and bortezomib (3 nM) as single agents for 48 hours and in triple combinations for 24 hour, in order to obtain 20–25% apoptosis. After this period, cells were collected and changes in GEP were analyzed. A summary of the most relevant genes specifically deregulated by the triple combination, grouped by categories is shown.

**Supp. table 1** Genes exclusively deregulated by panobinostat + dexamethasone + bortezomib

| Probe set         | Gene Symbol | MM1S FC | Description                                      |
|-------------------|-------------|---------|--------------------------------------------------|
| <b>Apoptosis</b>  |             |         |                                                  |
| 201466_s_at       | JUN         | 8.14    | jun oncogene                                     |
| 204121_at         | GADD45G     | 7.88    | growth arrest and DNA-damage-inducible, gamma    |
| 209305_s_at       | GADD45B     | 5.54    | growth arrest and DNA-damage-inducible, beta     |
| 225606_at         | BIM         | 3.46    | BCL2-like 11 (apoptosis facilitator)             |
| 204859_s_at       | APAF1       | 3.16    | apoptotic peptidase activating factor 1          |
| 213373_s_at       | CASP8       | 2.73    | caspase 8, apoptosis-related cysteine peptidase  |
| 205467_at         | CASP10      | 2.62    | caspase 10, apoptosis-related cysteine peptidase |
| 1729_at           | TRADD       | 2.36    | TNFRSF1A-associated via death domain             |
| 208906_at         | CYCS        | -2.54   | cytochrome c, somatic                            |
| 227143_s_at       | BID         | -2.76   | BH3 interacting domain death agonist             |
| 204824_at         | ENDO G      | -3.55   | endonuclease G                                   |
| 219366_at         | AVEN        | -5.14   | apoptosis, caspase activation inhibitor          |
| <b>Cell cycle</b> |             |         |                                                  |
| 219534_x_at       | CDKN1C      | 7.89    | cyclin-dependent kinase inhibitor 1C (p57, Kip2) |
| 213523_at         | CCNE1       | -2.34   | cyclin E1                                        |
| 200951_s_at       | CCND2       | -2.63   | cyclin D2                                        |
| 213226_at         | CCNA2       | -2.76   | cyclin A2                                        |
| 228361_at         | E2F2        | -3.03   | E2F transcription factor 2                       |
| 155772_at         | CDC25A      | -3.87   | cell division cycle 25 homolog A (S. pombe)      |
| 203967_at         | CDC6        | -4.23   | cell division cycle 6 homolog (S. cerevisiae)    |
| 204947_at         | E2F1        | -4.92   | E2F transcription factor 1                       |
| <b>Chemokine</b>  |             |         |                                                  |
| 205096_at         | CCR1        | -2.79   | chemokine (C-C motif) receptor 1                 |
| 207681_at         | CXCR3       | -33.2   | chemokine (C-X-C motif) receptor 3               |

**Supplementary Table 2.** Genes specifically deregulated by the triple combinations of PLD. MM1S cells were treated with panobinostat (7 nM), dexamethasone (0.9 μM) and lenalidomide (1 μM) as single agents for 48 hours and in triple combinations for 26 hours, in order to obtain 20–25% apoptosis. After this period, cells were collected and changes in GEP were analyzed. A summary of the most relevant genes specifically deregulated by the triple combination, grouped by categories, is shown.

**Supp. table 2** Genes exclusively deregulated by panobinostat + dexamethasone + lenalidomide

| Probe set         | Gene Symbol | MM1S FC | Description                                       |
|-------------------|-------------|---------|---------------------------------------------------|
| <b>Apoptosis</b>  |             |         |                                                   |
| 203140_at         | BCL6        | 24.02   | B-cell CLL/lymphoma 6 (zinc finger protein 51)    |
| 213598_at         | CASP4       | 4.78    | caspase 4, apoptosis-related cysteine peptidase   |
| 1552703_s_at      | CASP1       | 3.54    | caspase 1, apoptosis-related cysteine peptidase   |
| 204859_s_at       | APAF1       | 3.01    | apoptotic peptidase activating factor 1           |
| 1729_at           | TRADD       | 2.91    | TNFRSF1A-associated via death domain              |
| 201473_at         | JUNB        | 2.28    | jun B proto-oncogene                              |
| 220543_s_at       | FAIM        | -2.86   | Fas apoptotic inhibitory molecule                 |
| 201746_at         | TP53        | -2.87   | tumor protein p53 (Li-Fraumeni syndrome)          |
| 210792_x_at       | SIVA1       | -2.91   | SIVA1, apoptosis-inducing factor                  |
| 204824_at         | ENDO G      | -3.04   | endonuclease G                                    |
| 204493_at         | BID         | -3.18   | BH3 interacting domain death agonist              |
| 208906_at         | CYCS        | -3.30   | cytochrome c, somatic                             |
| 219366_at         | AVEN        | -3.40   | apoptosis, caspase activation inhibitor           |
| <b>Cell cycle</b> |             |         |                                                   |
| 216894_x_at       | CDKN1C      | 3.17    | cyclin-dependent kinase inhibitor 1C (p57, Kip2)  |
| 222156_x_at       | CCPG1       | 2.85    | cell cycle progression 1                          |
| 217988_at         | CCNB1IP1    | 2.65    | cyclin B1 interacting protein 1                   |
| 221427_s_at       | CCNL2       | 2.65    | cyclin L2                                         |
| 213523_at         | CCNE1       | -2.58   | cyclin E1                                         |
| 202246_s_at       | CDK4        | -2.95   | cyclin-dependent kinase 4                         |
| 200951_s_at       | CCND2       | -4.29   | cyclin D2                                         |
| 228361_at         | E2F2        | -4.49   | E2F transcription factor 2                        |
| 204126_s_at       | CDC45L      | -6.87   | CDC45 cell division cycle 45-like (S. cerevisiae) |
| <b>Chemokine</b>  |             |         |                                                   |
| 204103_at         | CCL4        | 3.84    | chemokine (C-C motif) ligand 4                    |
| 206978_at         | CCR2        | 3.33    | chemokine (C-C motif) receptor 2                  |
| 207681_at         | CXCR3       | -7.06   | chemokine (C-X-C motif) receptor 3                |
